# Supplementary material
Source: PubMed Central journal article supplement (PMC6410351)
Supplement: NIHMS1002615-supplement-1.pdf [file NIHMS1002615-supplement-1.pdf]

**Supplemental Table 1:** Plasma and serum analyte values missing at random (MAR) or identified as outliers by the ROUT method.

| Analyte       | Within 12h |          | Day 1   |          | Day 4   |          | Day 7   |          | Day 14  |          |
|---------------|------------|----------|---------|----------|---------|----------|---------|----------|---------|----------|
|               | MAR        | Outliers | MAR     | Outliers | MAR     | Outliers | MAR     | Outliers | MAR     | Outliers |
| IL-6          | 9 (21%)    | 0 (0%)   | 6 (14%) | 1 (2%)   | 4 (10%) | 0 (0%)   | 4 (10%) | 0 (0%)   | 6 (14%) | 0 (0%)   |
| IL-8          | 2 (5%)     | 2 (5%)   | 4 (10%) | 0 (0%)   | 6 (14%) | 0 (0%)   | 5 (12%) | 0 (0%)   | 3 (7%)  | 0 (0%)   |
| G-CSF         | 1 (2%)     | 5 (12%)  | 4 (10%) | 0 (0%)   | 5 (12%) | 0 (0%)   | 5 (12%) | 0 (0%)   | 4 (10%) | 0 (0%)   |
| SDF-1         | 0 (0%)     | 0 (0%)   | 1 (2%)  | 0 (0%)   | 4 (10%) | 0 (0%)   | 3 (7%)  | 0 (0%)   | 0 (0%)  | 0 (0%)   |
| TNF- $\alpha$ | 3 (7%)     | 0 (0%)   | 5 (12%) | 0 (0%)   | 3 (7%)  | 0 (0%)   | 3 (7%)  | 0 (0%)   | 1 (2%)  | 0 (0%)   |
| EPO           | 1 (2%)     | 0 (0%)   | 5 (12%) | 0 (0%)   | 4 (10%) | 0 (0%)   | 5 (12%) | 0 (0%)   | 3 (7%)  | 1 (2%)   |
| sTfR          | 1 (2%)     | 0 (0%)   | NA      | NA       | NA      | NA       | NA      | NA       | 1 (2%)  | 0 (0%)   |

IL-6: interleukin 6, IL-8: interleukin 8, G-CSF: granulocyte colony-stimulating factor, SDF-1, stromal-derived factor 1, TNF- $\alpha$ : tumor necrosis factor alpha, EPO: erythropoietin, sTfR: serum transferrin receptor. Data are presented as n (%).
